# Supplementary material for: Transcriptome Characterization Analysis of Bactrocera minax and New Insights into Its Pupal Diapause Development with Gene Expression Analysis
Source: PubMed Central journal article supplement — Int J Biol Sci. 2014 Sep 12;10(9):1051–63. doi: 10.7150/ijbs.9438 (PMC4183925; doi:10.7150/ijbs.9438), 2014-09-12
Supplement: ijbsv10p1051s9.pdf [file ijbsv10p1051s9.pdf]

**Supplemental Table S9. GO enrichment analysis in different comparisons.**

| Category               | GO_ID      | Term                                                          | Corrected P-value |                 |                 | Functional category |
|------------------------|------------|---------------------------------------------------------------|-------------------|-----------------|-----------------|---------------------|
| <b>Enriched in:</b>    |            |                                                               | <b>DT vs ED</b>   | <b>DT vs LD</b> | <b>DT vs PD</b> |                     |
| GO: Cellular Component | GO:0005737 | cytoplasm                                                     | 3.47e-10          | 5.13e-07        | 5.01e-09        | Metabolic process   |
| GO: Cellular Component | GO:0044444 | cytoplasmic part                                              | 9.24e-10          | 4.91e-07        | 5.47e-09        | Metabolic process   |
| GO: Cellular Component | GO:0044424 | intracellular part                                            | 5.77e-05          | 0.00068         | 0.00101         | Metabolic process   |
| GO: Cellular Component | GO:0005622 | intracellular                                                 | 0.00011           | 0.00130         | 0.00332         | Metabolic process   |
| GO: Cellular Component | GO:0000267 | cell fraction                                                 | 0.00025           | 0.00024         | 0.00020         | Metabolic process   |
| GO: Cellular Component | GO:0043226 | organelle                                                     | 0.00066           | 0.00122         | 0.00732         | Metabolic process   |
| GO: Cellular Component | GO:0043229 | intracellular organelle                                       | 0.00068           | 0.00428         | 0.00816         | Metabolic process   |
| GO: Cellular Component | GO:0005626 | insoluble fraction                                            | 0.00107           | 0.00639         | 0.00140         | Metabolic process   |
| GO: Cellular Component | GO:0043227 | membrane-bounded organelle                                    | 0.00242           | 0.00028         | 0.00327         | Metabolic process   |
| GO: Cellular Component | GO:0005783 | endoplasmic reticulum                                         | 0.00381           | 8.63e-06        | –               | Metabolic process   |
| GO: Cellular Component | GO:0043231 | intracellular membrane-bounded organelle                      | 0.00989           | 0.00068         | 0.00977         | Metabolic process   |
| GO: Cellular Component | GO:0044422 | organelle part                                                | 0.01795           | 0.00657         | –               | Metabolic process   |
| GO: Cellular Component | GO:0044432 | endoplasmic reticulum part                                    | 0.02617           | 5.38e-05        | –               | Metabolic process   |
| GO: Cellular Component | GO:0005840 | ribosome                                                      | 0.03243           | –               | 0.00022         | Metabolic process   |
| GO: Cellular Component | GO:0005789 | endoplasmic reticulum membrane                                | 0.03340           | 0.00044         | –               | Metabolic process   |
| GO: Cellular Component | GO:0031090 | organelle membrane                                            | 0.04373           | 0.00082         | 0.02375         | Metabolic process   |
| GO: Cellular Component | GO:0032991 | macromolecular complex                                        | –                 | 0.00533         | 0.00124         | Metabolic process   |
| GO: Cellular Component | GO:0005840 | ribosome subunit                                              | –                 | –               | 0.00300         | Metabolic process   |
| GO: Cellular Component | GO:0015934 | large ribosomal subunit                                       | –                 | –               | 0.00377         | Metabolic process   |
| GO: Cellular Component | GO:0030529 | ribonucleoprotein complex                                     | –                 | –               | 0.00929         | Metabolic process   |
| GO: Cellular Component | GO:0005773 | vacuole                                                       | –                 | –               | 0.04877         | Metabolic process   |
| GO: Cellular Component | GO:0042175 | nuclear outer membrane-endoplasmic reticulum membrane network | –                 | 0.00105         | –               | Metabolic process   |

| GO: Cellular Component | GO:0000502 | proteasome complex                       | -                 | 0.01954 | -                   | Metabolic process   |
|------------------------|------------|------------------------------------------|-------------------|---------|---------------------|---------------------|
| GO: Molecular Function | GO:0017016 | Ras GTPase binding                       | 0.01667           | -       | -                   | Protein binding     |
| GO: Molecular Function | GO:0031267 | small GTPase binding                     | 0.01667           | -       | -                   | Protein binding     |
| GO: Molecular Function | GO:0051020 | GTPase binding                           | 0.01667           | -       | -                   | Protein binding     |
| GO: Molecular Function | GO:0005198 | structural molecule activity             | -                 | -       | 0.01927             | Stress response     |
| GO: Biological Process | GO:0006412 | translation                              | 0.00031           | -       | 0.00260             | Metabolic process   |
| GO: Biological Process | GO:0010033 | response to organic substance            | 0.00887           | 0.00576 | 0.00107             | Stress response     |
| GO: Biological Process | GO:0009058 | biosynthetic process                     | 0.01345           | -       | -                   | Metabolic process   |
| GO: Biological Process | GO:0009719 | response to endogenous stimulus          | 0.03044           | 0.02144 | 0.00596             | Stress response     |
| GO: Biological Process | GO:0007249 | I-kappaB kinase/NF-kappaB cascade        | -                 | -       | 0.00759             | Signal transduction |
| GO: Biological Process | GO:0043066 | negative regulation of apoptotic process | -                 | -       | 0.04376             | Cellular process    |
| GO: Biological Process | GO:0042981 | regulation of apoptotic process          | -                 | -       | 0.04499             | Cellular process    |
| GO: Biological Process | GO:0008152 | metabolic process                        | -                 | 0.02149 | -                   | Metabolic process   |
| GO: Biological Process | GO:0006461 | protein complex assembly                 | -                 | 0.02505 | -                   | Metabolic process   |
| GO: Biological Process | GO:0070271 | protein complex biogenesis               | -                 | 0.02505 | -                   | Metabolic process   |
| Category               | GO_ID      | Term                                     | Corrected P-value |         | Functional category |                     |
| <b>Enriched in:</b>    |            |                                          | <b>PD vs ED</b>   |         |                     |                     |
| GO: Cellular Component | GO:0005783 | endoplasmic reticulum                    | 0.01001           |         | Metabolic process   |                     |
| GO: Cellular Component | GO:0005737 | cytoplasm                                | 0.04988           |         | Metabolic process   |                     |
| <b>Enriched in:</b>    |            |                                          | <b>LD vs ED</b>   |         |                     |                     |
| GO: Cellular Component | GO:0000502 | proteasome complex                       | 0.00808           |         | Metabolic process   |                     |
| GO: Cellular Component | GO:0031975 | envelope                                 | 0.02815           |         | Metabolic process   |                     |
| <b>Enriched in:</b>    |            |                                          | <b>PD vs LD</b>   |         |                     |                     |
| GO: Cellular Component | GO:0005783 | endoplasmic reticulum                    | 0.00091           |         | Metabolic process   |                     |
| GO: Cellular Component | GO:0044432 | endoplasmic reticulum part               | 0.01896           |         | Metabolic process   |                     |
| GO: Cellular Component | GO:0000178 | exosome (RNase complex)                  | 0.03555           |         | Metabolic process   |                     |
