# Supplementary material for: Transcriptome Characterization Analysis of Bactrocera minax and New Insights into Its Pupal Diapause Development with Gene Expression Analysis
Source: PubMed Central journal article supplement — Int J Biol Sci. 2014 Sep 12;10(9):1051–63. doi: 10.7150/ijbs.9438 (PMC4183925; doi:10.7150/ijbs.9438), 2014-09-12
Supplement: ijbsv10p1051s13.pdf [file ijbsv10p1051s13.pdf]

## Additional files

### Figure S1 - Characteristic analysis of the homology search for transcriptome unigenes against the NR database

(A) E-value distribution of BLAST hits for each unique sequence with a cut-off E-value of  $1.0E-5$ ; (B) Similarity in distribution of the top BLAST hits for each sequence; (C) Species distribution is shown as a percentage of the total homologous sequences with an E-value of at least  $1.0E-5$ . We used the first hit of each sequence for analysis.

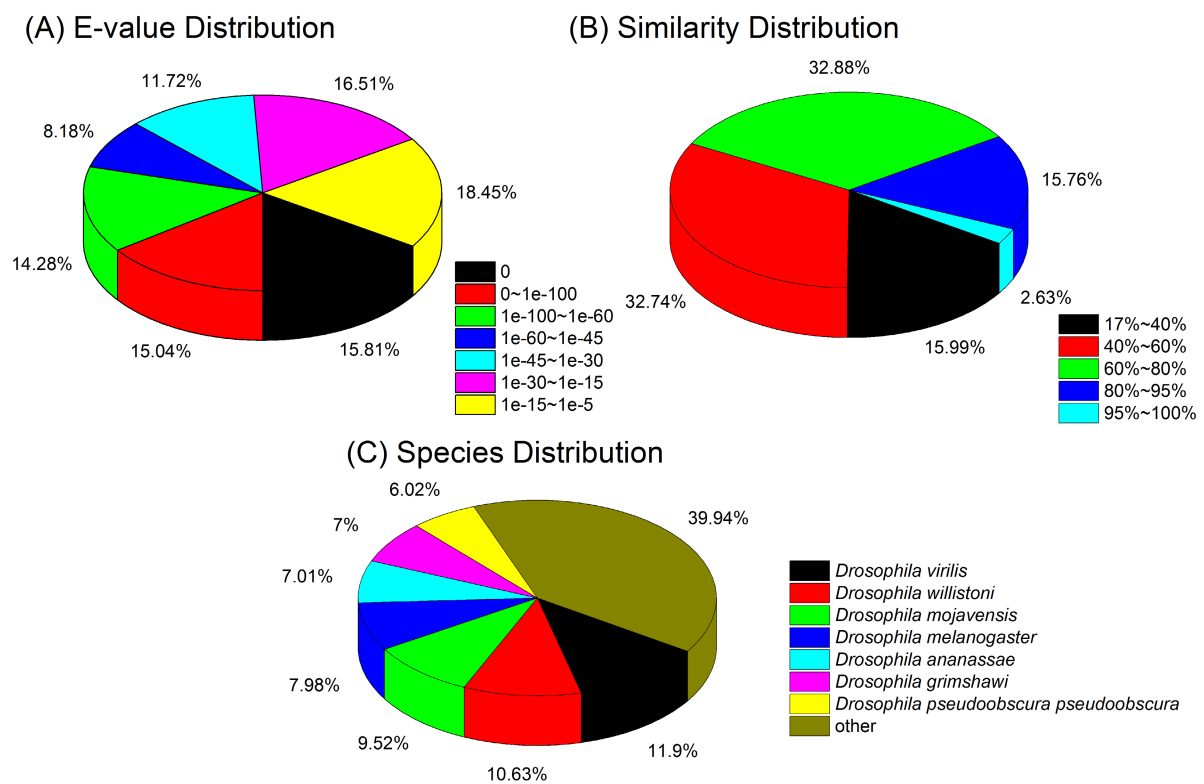

**Figure S2 - Histogram presentation of the (A) gene ontology (GO) and (B) clusters of orthologous group (COG) classification**

(A) The results are listed in three categories: biological process, cellular component and molecular function. (B) Out of 28,779 BLAST hits, 10,784 sequences are classified into 25 COG categories.

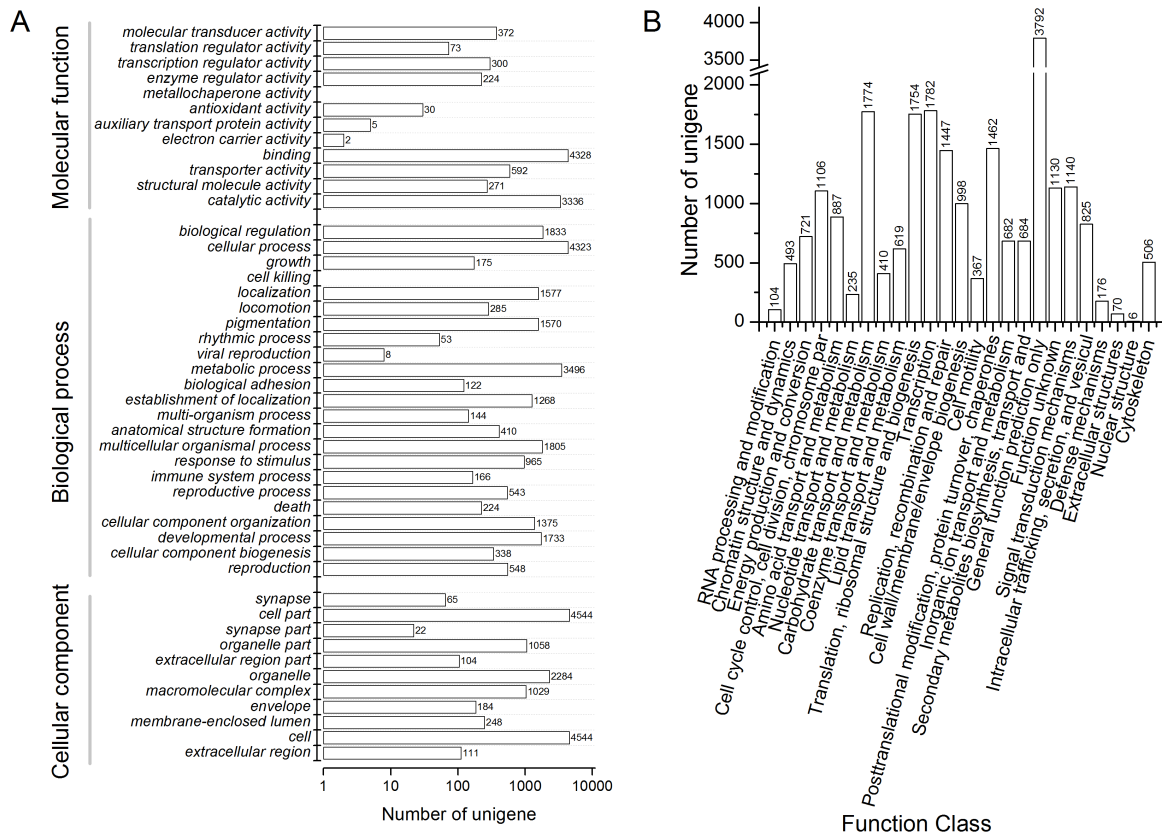

**Figure S3 – Different components of the raw tags and distribution of distinct tags in each sample.**

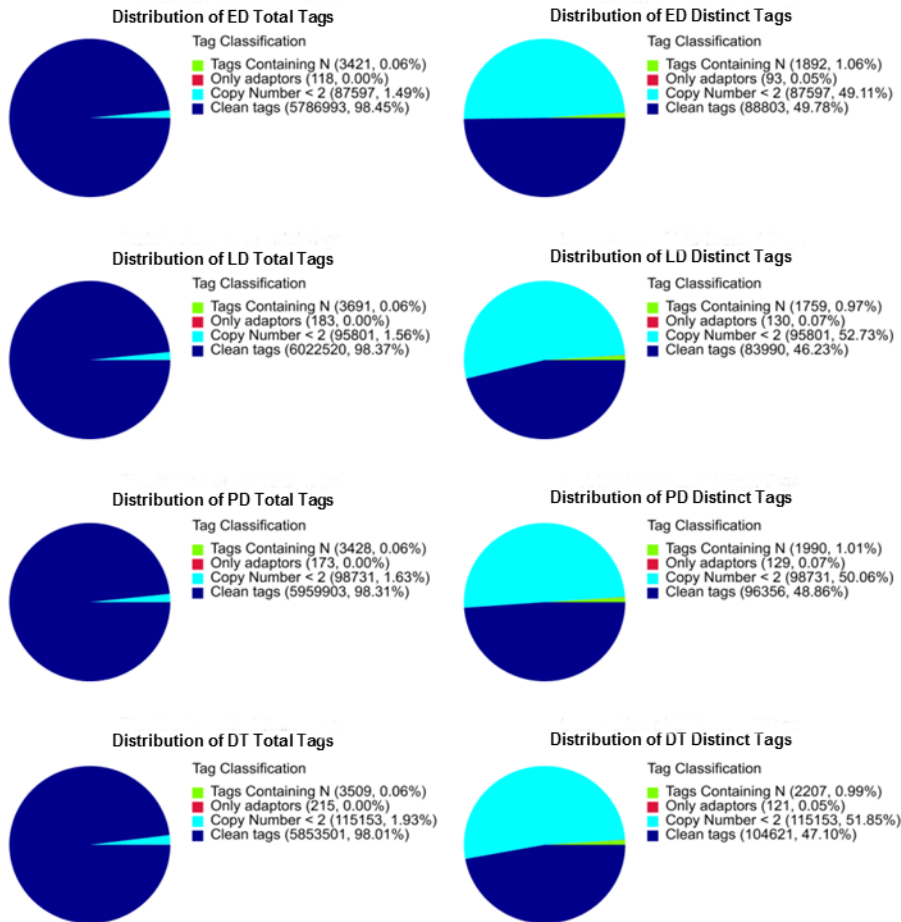

**Figure S4 –Distribution of total tags and distinct tags in each sample.**

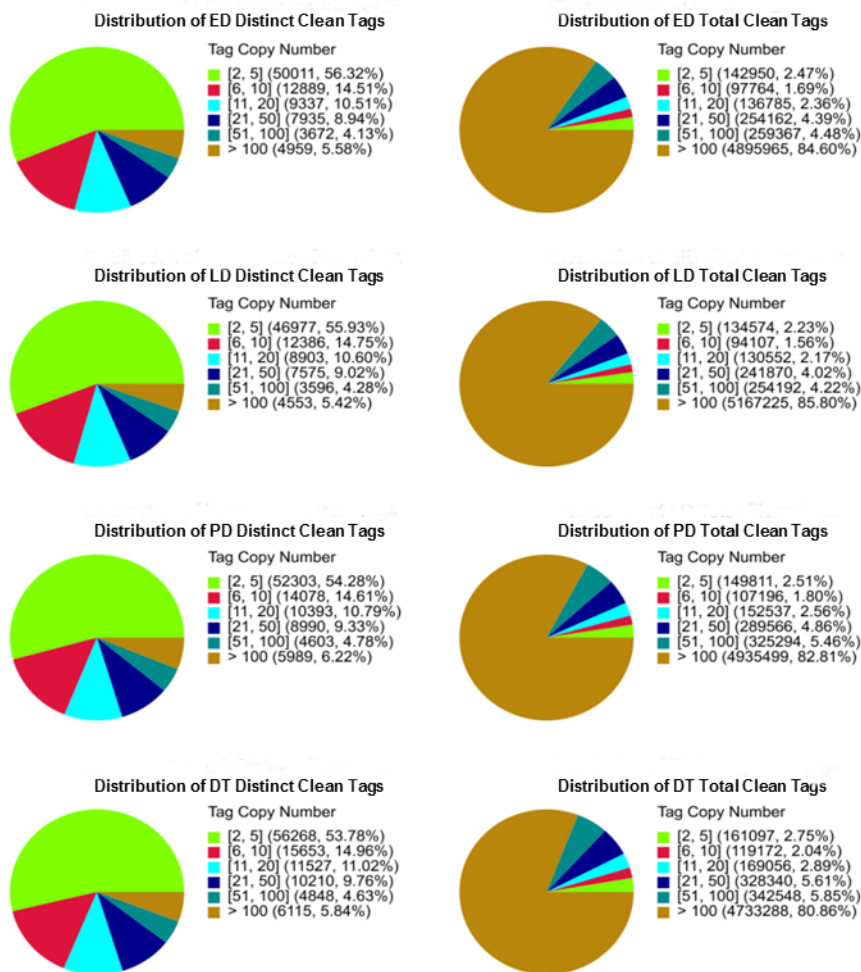

Figure S5 – The gene expression level in all comparisons.

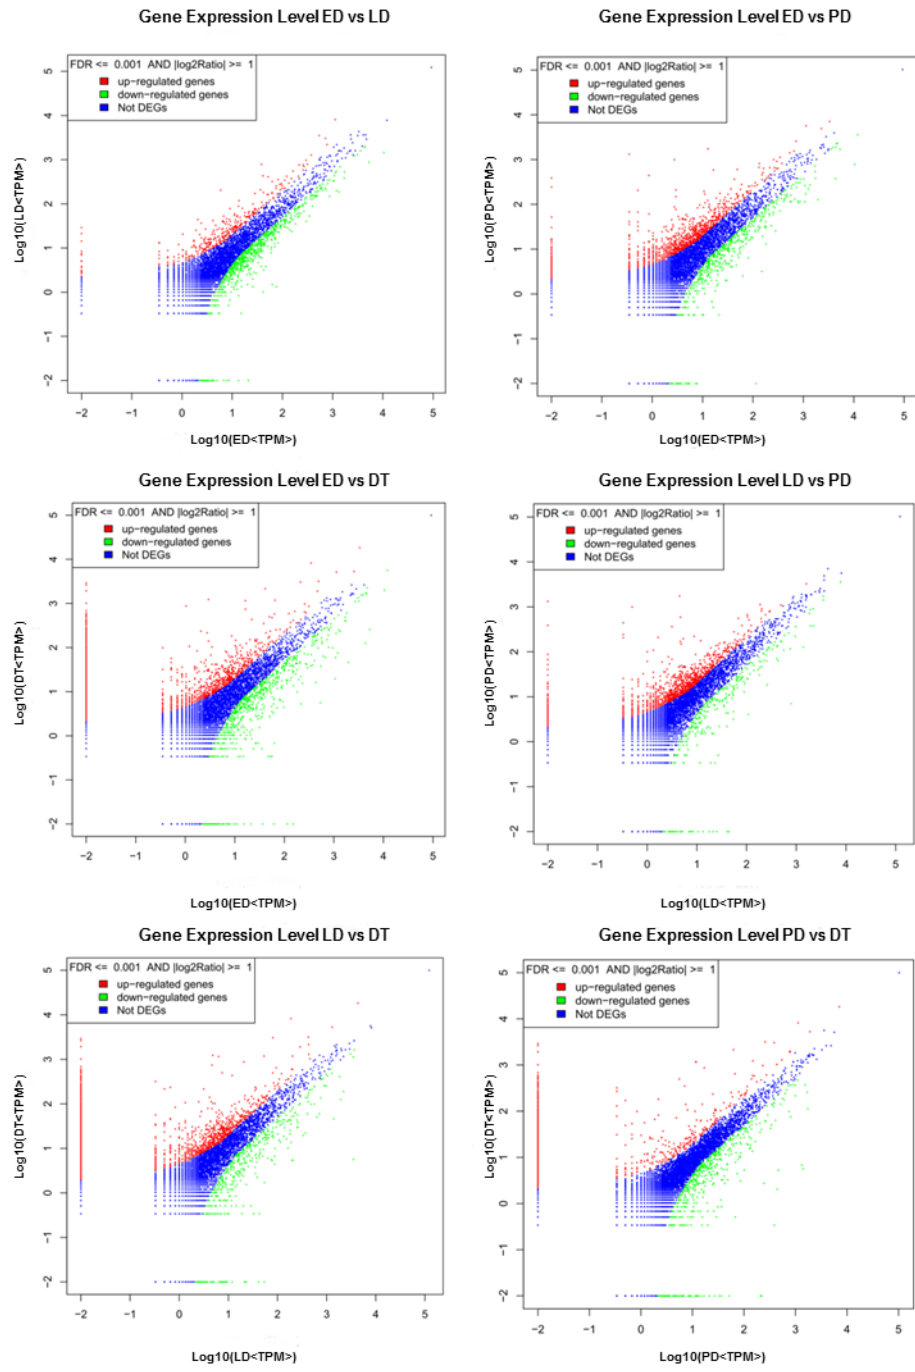

**Table S1 – Sample collection and RNA extraction strategy.**

(XLSX)

**Table S2 – The specific primers used in qRT-PCR to validate differentially expressed genes.**

(XLSX)

**Table S3 – Use of Sanger sequencing to verify the quality of RNA-seq results.**

(XLSX)

**Table S4 – Top hits obtained by BLASTX against NR database for the total unigenes.**

(XLSX)

**Table S5 – The GO annotation of unigenes.**

(XLSX)

**Table S6 – KO annotation of unigenes.**

(XLSX)

**Table S7 – Tag analysis statistics.**

(XLSX)

**Table S8 –Differentially expressed tags were filtered with the absolute value of  $\log_2\text{Ratio} \geq 1$  based on the  $\text{FDR} < 0.001$  from the tandem comparison of samples i.e., LD vs DT, PD vs DT, ED vs LD, ED vs PD, ED vs DT, LD vs PD.**

(XLSX)

**Table S9 – GO enrichment analysis in different comparisons.**

(DOC)

**Table S10 – KO enrichment analysis in different comparisons.**

(XLSX)

**Table S11– Differentially expressed genes filtered according to the absolute value of  $\log_2\text{Ratio} \geq 1$  based on the  $\text{FDR} < 0.001$  among ED, LD and PD were annotated in different databases.**

(XLSX)

**Table S12– Putatively identified Heat shock protein were filtered with the absolute value of  $\log_2\text{Ratio} \geq 1$  based on the  $\text{FDR} < 0.001$  among ED, LD and PD.**

(XLSX)
